# Supplementary material
Source: PubMed Central journal article supplement (PMC1413908)
Supplement: pnas_0511062103_5.pdf [file pnas_0511062103_5.pdf]

**Table 1. MS analysis of AP-1A-coated liposomes**

| Protein                                                              | NCBI GI number       | Predicted Mr (Da) | LC-MS/MS analysis         | MALDI-TOF/TOF analysis |                        |                   |             |
|----------------------------------------------------------------------|----------------------|-------------------|---------------------------|------------------------|------------------------|-------------------|-------------|
|                                                                      |                      |                   | No. of sequenced peptides | Mascot score           | Matched/total peptides | Sequence coverage | Peak number |
| <b>Coat components</b>                                               |                      |                   |                           |                        |                        |                   |             |
| Clathrin heavy chain                                                 | 66773801             | 191,557           | 33                        | 317                    | 47/75                  | 38%               | 2           |
| Clathrin light chain B                                               | 62510439             | 25,172            | 3                         |                        |                        |                   |             |
| Clathrin light chain A                                               | 2493731              | 25,557            | 3                         |                        |                        |                   |             |
| AP-1 $\beta$ 1                                                       | 21541948             | 104,540           | 26                        | 215                    | 28/52                  | 36%               | 5           |
| AP-1 $\gamma$ 1                                                      | 113349               | 91,202            | 21                        | 203                    | 27/47                  | 43%               | 6           |
| AP-1 $\mu$ 1                                                         | 543817               | 48,512            | 18                        | 161                    | 22/60                  | 53%               | 8           |
| AP-1 $\sigma$ 1B                                                     | 21541960             | 18,917            | 4                         |                        |                        |                   |             |
| AP-1 $\sigma$ 1A                                                     | 48428720             | 18,721            | 5                         |                        |                        |                   |             |
| AP-1 $\gamma$ -subunit binding protein 1 ( $\gamma$ -synergin)       | 34996507             | 122,005           |                           | 100                    | 16/37                  | 18%               |             |
| ARF-1/ARF-3                                                          | 51316986<br>47117658 | 20,553<br>20,457  | 9                         | 75                     | 9/39                   | 56%               | 11          |
| ARF-GEF 2 (brefeldin A-inhibited)                                    | 63492672             | 181,465           | 8                         | 78                     | 25/81                  | 22%               | 1           |
| G protein-coupled receptor kinase-interactor 1 (ARF-GAP Git1)        | 58864889             | 84,195            | 11                        | 94                     | 14/48                  | 32%               | 7           |
| G protein-coupled receptor kinase-interactor 2 (ARF-GAP Git2)        | 18203126             | 78,747            | 9                         |                        |                        |                   |             |
| Arfaptin 1                                                           | 63501125             | 41,518            | 3                         |                        |                        |                   |             |
| Arfaptin 2                                                           | 67460562             | 37,773            | 5                         |                        |                        |                   |             |
| <b>Actin nucleation</b>                                              |                      |                   |                           |                        |                        |                   |             |
| Nck-associated protein 1 (HEM-2)                                     | 26986194             | 128,784           | 25                        | 69                     | 12/29                  | 14%               | 4           |
| CYFIP2                                                               | 19526988             | 145,589           |                           | 388*                   | 46/86                  | 41%               | 3           |
| Abi-1                                                                | 50400517             | 52,255            | 5                         |                        |                        |                   |             |
| Abi-2                                                                | 50400259             | 49,356            | 7                         |                        |                        |                   |             |
| SH3 adapter protein SPIN90 (Nck-interacting protein with SH3 domain) | 57015413             | 78,523            | 6                         |                        |                        |                   |             |
| WASP-family protein member 1                                         | 16877274             | 61,471            | 6                         |                        |                        |                   |             |
| WASP-family protein member 3                                         | 20071942             | 55,170            | 4                         |                        |                        |                   |             |
| ARP 2/3 complex subunit 1A                                           | 59797974             | 41,600            | 4                         |                        |                        |                   |             |
| ARP 2/3 complex subunit 2                                            | 23621467             | 34,357            | 4                         |                        |                        |                   |             |
| ARP 2/3 complex subunit 4                                            | 38372626             | 19,523            | 5                         |                        |                        |                   |             |
| ARP 2/3 complex subunit 3                                            | 62899893             | 20,525            | 2                         |                        |                        |                   |             |
| p21-Rac1                                                             | 51702788             | 21,436            | 4                         | 108                    | 5/51                   | 31%               | 10          |
| Cdc42 homolog                                                        | 46397379             | 21,297            | 3                         |                        |                        |                   |             |
| SLIT-ROBO Rho-GAP3 (WAVE-associated Rac-GAP)                         | 48428625             | 124,341           | 32                        | 85                     | 18/60                  | 21%               |             |
| Rho-GEF 7 (PAK-interacting exchange factor $\beta$ )                 | 18202873             | 79,782            | 13                        | 178                    | 13/20                  | 16%               |             |
| PAK 3                                                                | 47117898             | 62,358            | 11                        |                        |                        |                   |             |
| <b>Lipid modification</b>                                            |                      |                   |                           |                        |                        |                   |             |
| PI-4-Kinase III $\beta$                                              | 51262078             | 89,887            |                           | 78†                    | 7/30                   | 14%               |             |
| <b>Membrane fusion</b>                                               |                      |                   |                           |                        |                        |                   |             |
| Rab11B                                                               | 1172815              | 24,474            | 11                        | 86                     | 9/47                   | 54%               | 9           |
| Rab14                                                                | 46577103             | 23,882            | 10                        | 165                    | 15/47                  | 74%               | 9           |
| Rab4                                                                 | 15986733             | 23,539            | 4                         | 131‡                   | 6/50                   | 38%               |             |

\* Combined mascot score: 2 sequenced peptides ( $[M+H]^+$  1420.83 <sup>1053</sup>YAPLHLVPLIER<sup>1064</sup> and 1824.00 <sup>477</sup>NTIYAALQDFAQVTLR<sup>492</sup>).

† Combined mascot score: 1 sequenced peptide ( $[M+H]^+$  1187.63 <sup>482</sup>EPVFIAAGDIR<sup>492</sup>).

‡ Combined mascot score: 1 sequenced peptide ( $[M+H]^+$  1406.75 <sup>80</sup>GAAGALLVYDITSR<sup>93</sup>).
