# Supplementary material
Source: PubMed Central journal article supplement (PMC1413908)

**+ gpl cd**

---

**mArf1**

**+**

**-**

**+**

**+**

**GTP- $\gamma$ S**

**+**

**+**

**-**

**+**

**BFA**

**-**

**-**

**-**

**+**

**$\gamma$ -Adaptin**

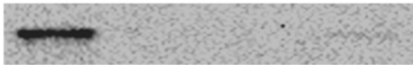

**$\sigma$ 3 (A/B)**

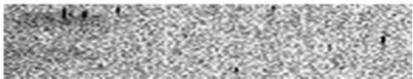

**Arf1**

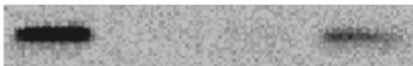

Supplement: pnas_0511062103_1.pdf [file pnas_0511062103_1.pdf]

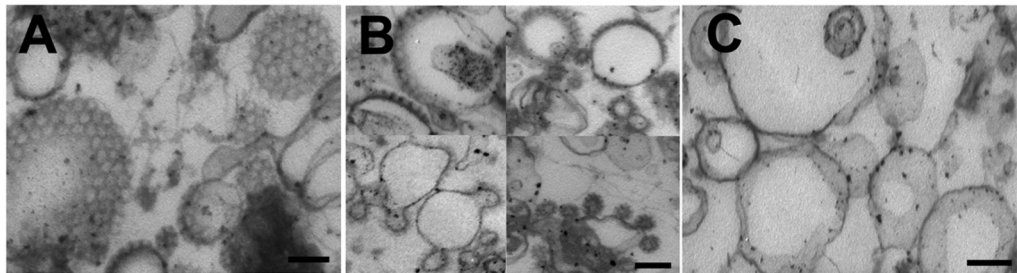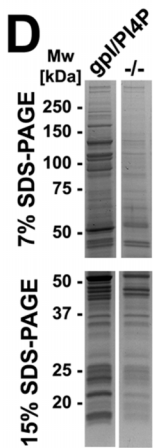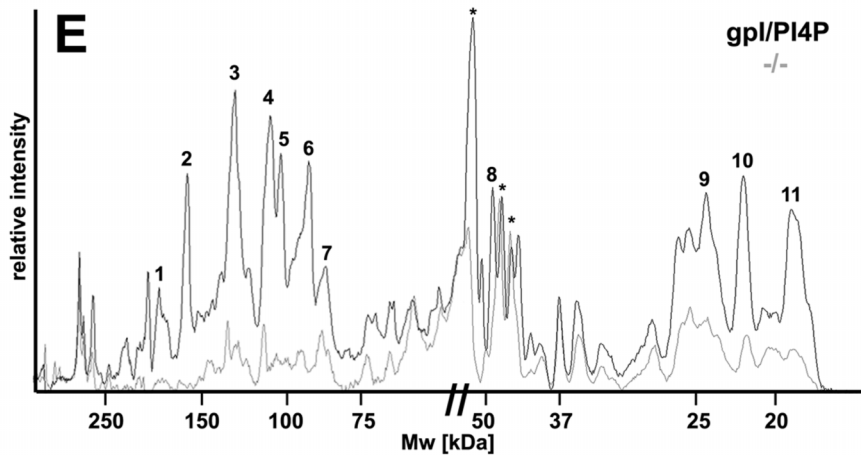

Supplement: pnas_0511062103_3.pdf [file pnas_0511062103_3.pdf]

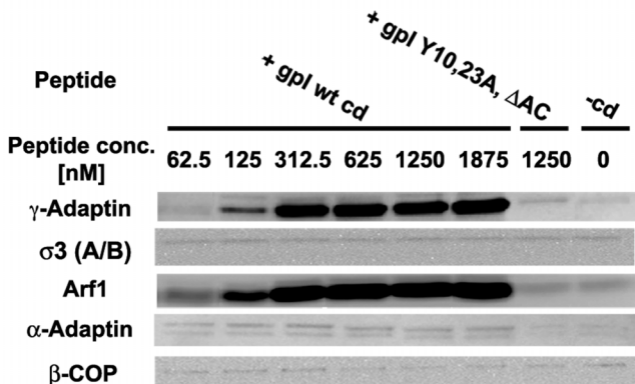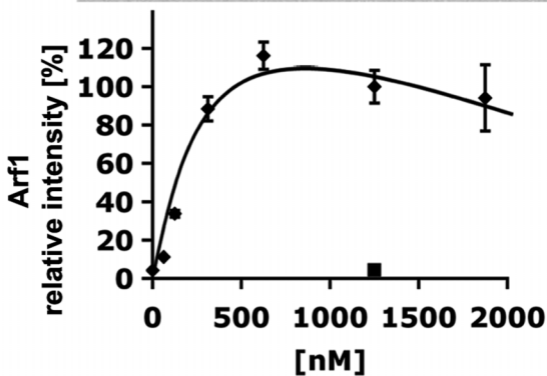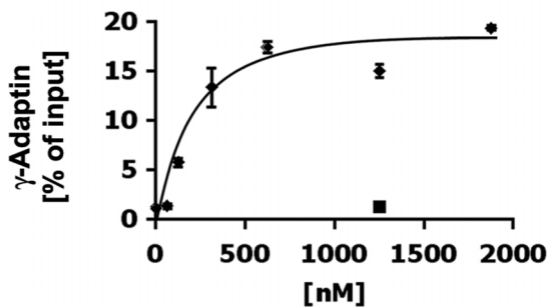

Supplement: pnas_0511062103_4.pdf [file pnas_0511062103_4.pdf]
